# Supplementary material
Source: Springer Nature journal article supplement (https://www.springermedizin.de/resource/supplementary/13054_2012_648_MOESM9_ESM.pdf/9708942)

A

serum IL-6

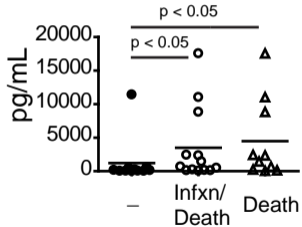

B

stimulated IFN $\gamma$  secretion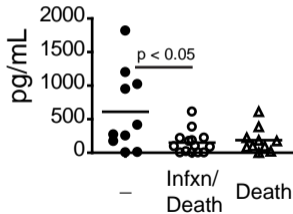

Supplement: MOESM9 [file 9708942]
